# Supplementary material for: Impact of posttranslational modifications on atomistic structure of fibrinogen
Source: PubMed Central journal article supplement (PMC6988951; doi:10.1371/journal.pone.0227543), 2020-01-29
Supplement: pone.0227543.s002.pdf [file pone.0227543.s002.pdf]

## PTMs detected in fibrinogen by mass spectrometry

| A $\alpha$ chain |     |       |     |       |
|------------------|-----|-------|-----|-------|
| AA               | pos | NaOCl | MDA | SIN-1 |
| D                | 32  | oxi   |     |       |
| P                | 34  | oxi   |     |       |
| Y                | 43  | ami   |     |       |
| D                | 56  | met   |     |       |
| K                | 70  | oxi   | oxi |       |
| K                | 123 |       | HNE |       |
| N                | 139 | oxi   |     |       |
| R                | 141 | dio   |     |       |
| R                | 141 | oxi   |     |       |
| K                | 148 | dio   |     |       |
| K                | 176 | oxi   |     |       |
| E                | 179 | met   |     | met   |
| P                | 209 |       | oxi |       |
| D                | 212 | oxi   |     |       |
| D                | 234 | oxi   |     |       |
| N                | 269 | oxi   |     |       |
| P                | 270 | dio   |     |       |
| W                | 276 | kyn   |     |       |
| W                | 276 | dio   |     | dio   |
| W                | 276 | hky   |     |       |
| N                | 277 |       |     | met   |
| D                | 477 | oxi   |     |       |
| D                | 477 | met   |     |       |
| K                | 508 |       | oxi |       |
| F                | 513 | dio   |     |       |
| F                | 514 |       | dio |       |
| P                | 516 | pyE   |     |       |
| P                | 516 | dio   |     |       |
| E                | 520 |       | met |       |
| P                | 546 | oxi   | pyE |       |
| E                | 578 | met   |     |       |
| D                | 586 | oxi   |     |       |
| K                | 601 |       | HNE |       |

| B $\beta$ chain |     |       |     |       |
|-----------------|-----|-------|-----|-------|
| AA              | pos | NaOCl | MDA | SIN-1 |
| E               | 25  | met   | met |       |
| P               | 27  | pyE   | pyE |       |
| F               | 115 | oxi   |     | oxi   |
| Y               | 117 | oxi   |     |       |
| K               | 122 | oxi   | ace | oxi   |
| K               | 130 |       | ace |       |
| K               | 133 | oxi   | ace |       |
| D               | 134 | met   | met |       |
| E               | 141 |       | met |       |
| Y               | 142 | ami   |     |       |
| E               | 147 |       | met |       |
| H               | 149 | oxi   | oxi |       |
| Y               | 152 |       | oxi |       |
| Y               | 152 | ami   | ami |       |
| D               | 154 |       | oxi |       |
| D               | 154 | met   | met |       |
| S               | 184 |       | mal |       |
| K               | 217 | oxi   |     | oxi   |
| E               | 220 |       | met |       |
| Y               | 225 | ami   |     | ami   |
| Y               | 239 |       | ami |       |
| Y               | 239 |       | chl | dic   |
| D               | 240 |       |     | met   |
| E               | 245 |       | met |       |
| N               | 246 | oxi   |     |       |
| W               | 249 | dio   | oxa |       |
| W               | 249 |       | hky |       |
| W               | 249 |       | kyn |       |
| F               | 273 | oxi   | oxi |       |
| Y               | 285 | ami   |     |       |
| Y               | 285 | dic   |     |       |
| P               | 289 |       |     | oxi   |
| Y               | 292 | ami   | dio |       |
| W               | 293 | oxi   | dio | oxa   |
| P               | 307 | dio   |     |       |
| W               | 317 | oxi   | dio |       |
| W               | 317 |       | kyn |       |
| W               | 317 |       | oxa |       |
| K               | 318 |       | oxi |       |
| K               | 318 |       | dio |       |
| H               | 325 | oxi   | oxi |       |
| Y               | 326 |       | ami |       |
| E               | 334 | met   | met |       |
| H               | 370 | oxi   |     |       |
| N               | 371 | oxi   |     |       |
| D               | 381 | oxi   |     |       |
| D               | 383 | oxi   |     |       |

| $\gamma$ chain |     |       |     |       |
|----------------|-----|-------|-----|-------|
| AA             | pos | NaOCl | MDA | SIN-1 |
| E              | 13  |       |     | met   |
| K              | 58  | oxi   |     |       |
| P              | 70  | pyE   |     |       |
| P              | 70  | dio   |     |       |
| E              | 72  | met   |     |       |
| P              | 76  | pyE   | pyE |       |
| D              | 80  | met   |     |       |
| Y              | 96  | ami   | nit |       |
| Y              | 96  | chl   |     |       |
| E              | 97  | met   | met |       |
| Y              | 109 | dic   |     | ami   |
| K              | 120 | oxi   |     |       |
| E              | 213 | met   | met |       |
| F              | 215 | dio   |     |       |
| H              | 217 |       | oxi |       |
| P              | 220 |       | oxi |       |
| P              | 220 |       | pyE |       |
| F              | 226 | dio   |     |       |
| W              | 227 | oxa   |     | oxa   |
| K              | 232 | oxi   |     |       |
| F              | 322 |       |     | dio   |
| H              | 340 | oxi   |     |       |
| H              | 343 | oxi   |     |       |
| N              | 345 | oxi   | oxi |       |
| R              | 375 | oxi   |     |       |
| K              | 380 | oxi   |     |       |
| K              | 381 | oxi   |     |       |
| K              | 406 | oxi   |     |       |

|   |     |     |     |     |
|---|-----|-----|-----|-----|
| D | 383 | met |     |     |
| W | 385 | oxa |     |     |
| W | 385 | dio |     |     |
| D | 389 |     | met |     |
| C | 394 | mal |     |     |
| S | 395 | mal |     |     |
| W | 419 |     | oxi |     |
| Y | 422 |     |     | oxi |
| W | 437 | oxi | oxi |     |
| K | 441 | oxi |     | oxi |
| K | 453 |     |     | oxi |
| F | 458 |     |     | oxi |

**Table S1.** List of all PTMs detected in fibrinogen by MS. Amino acid numbering according to mature protein chains. Abbreviations used (alphabetically): ace = acetaldehydation, ami = amination, chl = chloration, Dha = docosahexaenoic acid, dic = dichloration, dio = dioxidation, HNE = hydroxynonenal, hky = hydroxykynurenine, kyn = kynurenine, mal = malonylation, met = methylation, nit = nitration, oxa = oxalacetate, oxi = oxidation, pyE = pyroglutamate
