# Supplementary material for: Impact of posttranslational modifications on atomistic structure of fibrinogen
Source: PubMed Central journal article supplement (PMC6988951; doi:10.1371/journal.pone.0227543), 2020-01-29
Supplement: pone.0227543.s003.pdf [file pone.0227543.s003.pdf]

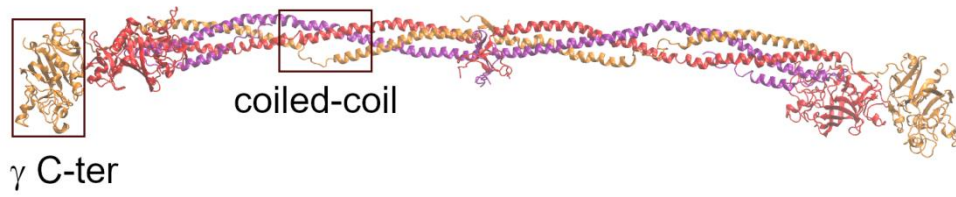

**Fig S1.** Simulated parts of fibrinogen. Crystal structure 3GHG with highlighted regions used for MD simulations.  $\gamma$ -nodule contains amino acids  $\gamma$ 148 –  $\gamma$ 394, coiled-coil connector contains amino acids  $A\alpha$ 70 –  $A\alpha$ 126,  $B\beta$ 101 –  $B\beta$ 157 and  $\gamma$ 47 –  $\gamma$ 97.  $A\alpha$  chain is shown in magenta,  $B\beta$  chain in red and  $\gamma$  chain in orange. Note that following parts of fibrinogen are missing in the crystal structure:  $A\alpha$ 1 –  $A\alpha$ 26,  $A\alpha$ 213 –  $A\alpha$ 610,  $B\beta$ 1 –  $B\beta$ 57,  $B\beta$ 459 –  $B\beta$ 461,  $\gamma$ 1,  $\gamma$ 396 –  $\gamma$ 411.
