# Supplementary material for: Impact of posttranslational modifications on atomistic structure of fibrinogen
Source: PubMed Central journal article supplement (PMC6988951; doi:10.1371/journal.pone.0227543), 2020-01-29
Supplement: pone.0227543.s004.pdf [file pone.0227543.s004.pdf]

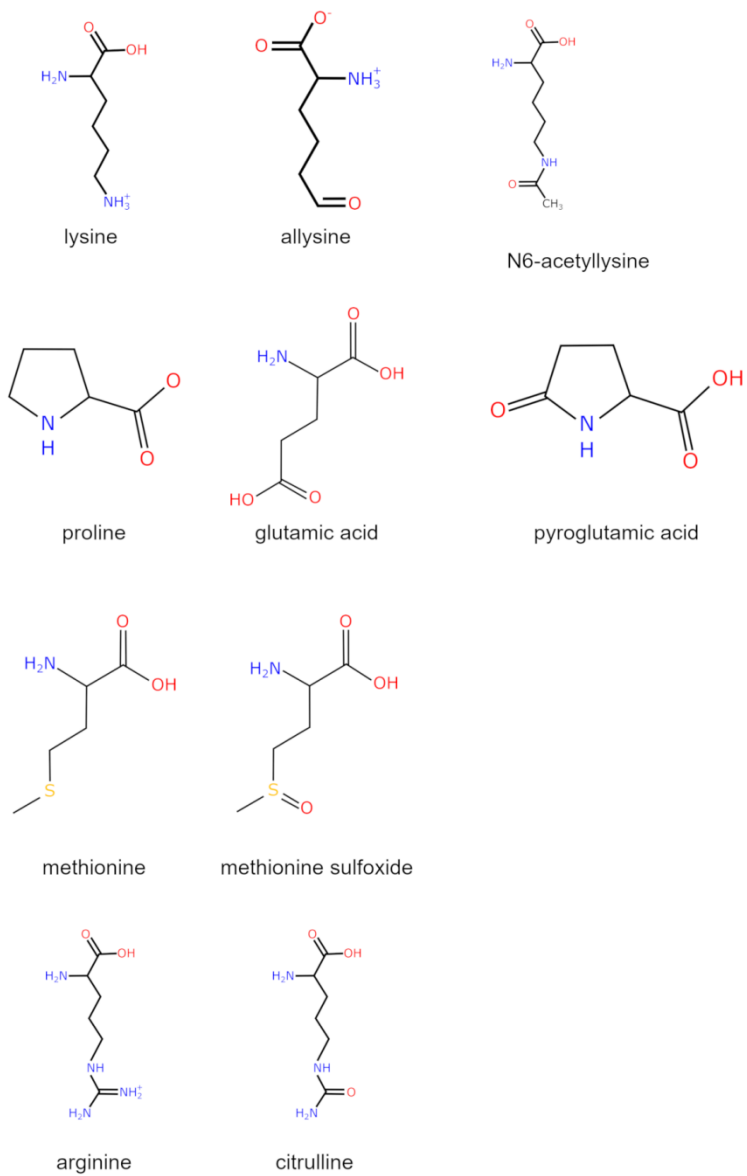

**Fig S2.** Chemical formulae of non-proteinogenic amino acids those were introduced into fibrinogen structure as a result of PTM. Formulae of the original proteinogenic amino acids are shown as we
