# Supplementary material for: Impact of posttranslational modifications on atomistic structure of fibrinogen
Source: PubMed Central journal article supplement (PMC6988951; doi:10.1371/journal.pone.0227543), 2020-01-29
Supplement: pone.0227543.s007.pdf [file pone.0227543.s007.pdf]

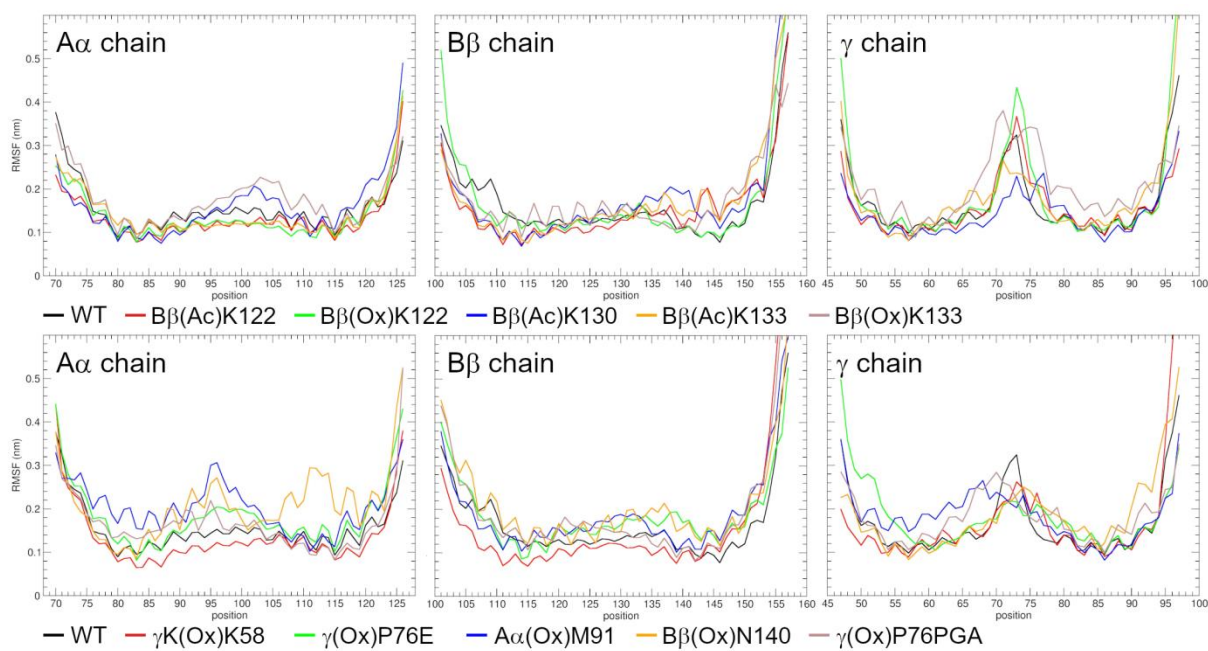

**Fig S5.** RMSF of C<sub>α</sub> carbons computed over the last 25 ns of simulations of the coiled-coil connector systems. RMSF for each fibrinogen chain is shown separately.
