# Supplementary material for: Impact of posttranslational modifications on atomistic structure of fibrinogen
Source: PubMed Central journal article supplement (PMC6988951; doi:10.1371/journal.pone.0227543), 2020-01-29
Supplement: pone.0227543.s008.pdf [file pone.0227543.s008.pdf]

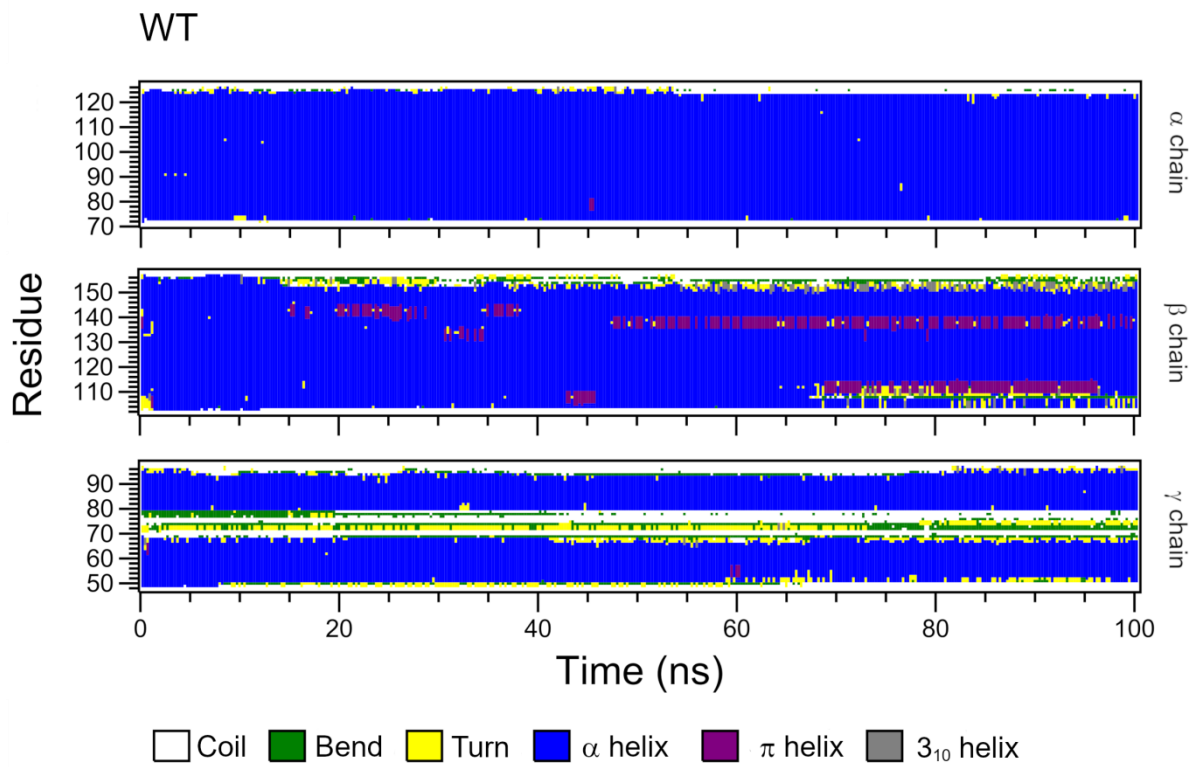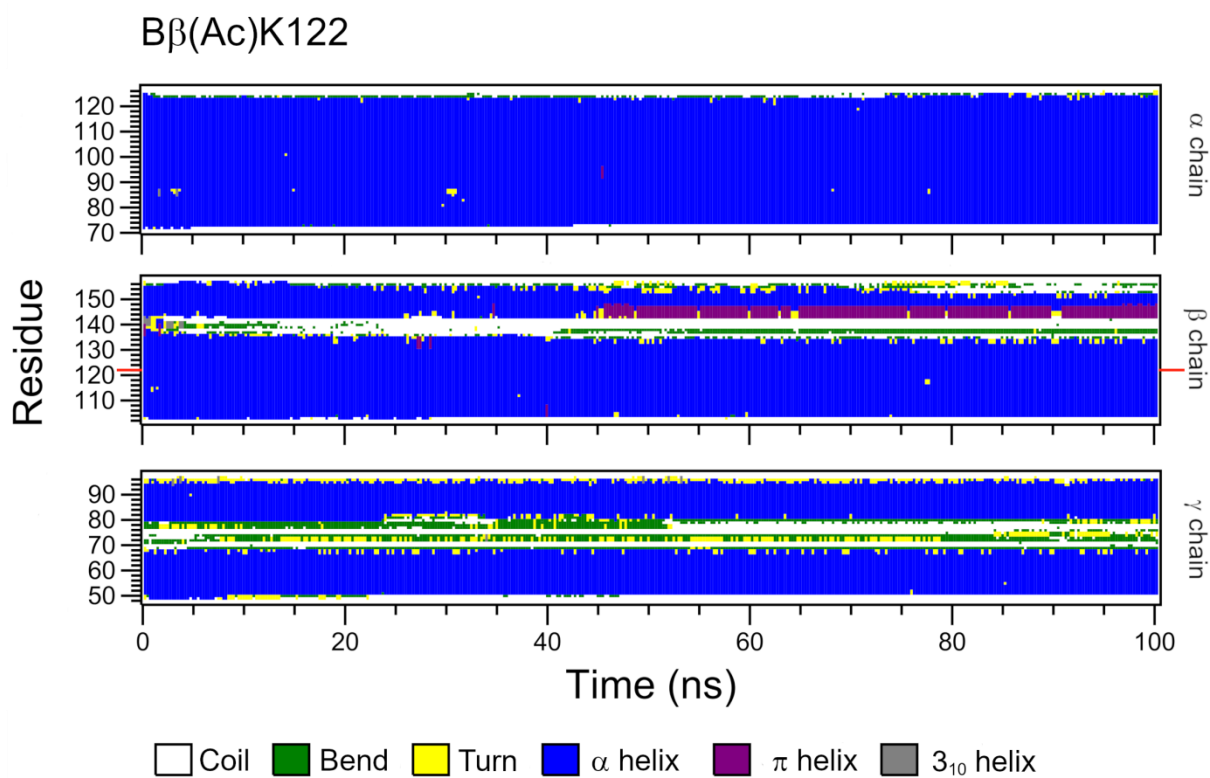

### B $\beta$ (Ox)K122

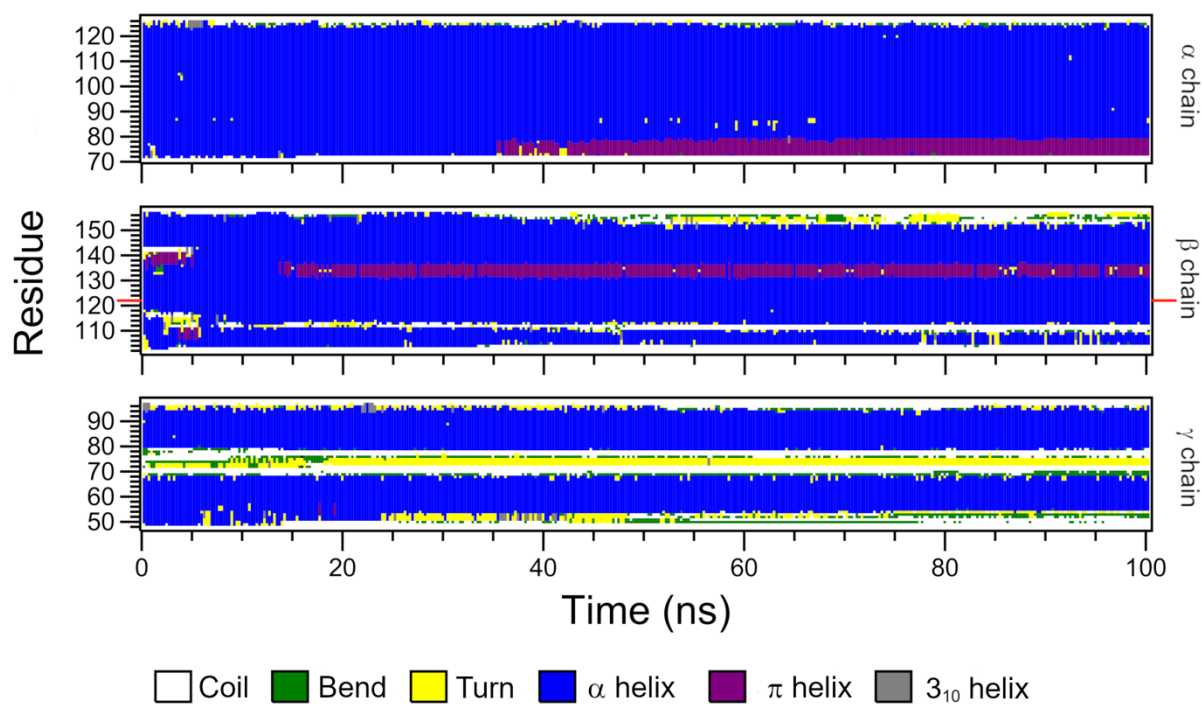

### B $\beta$ (Ac)K130

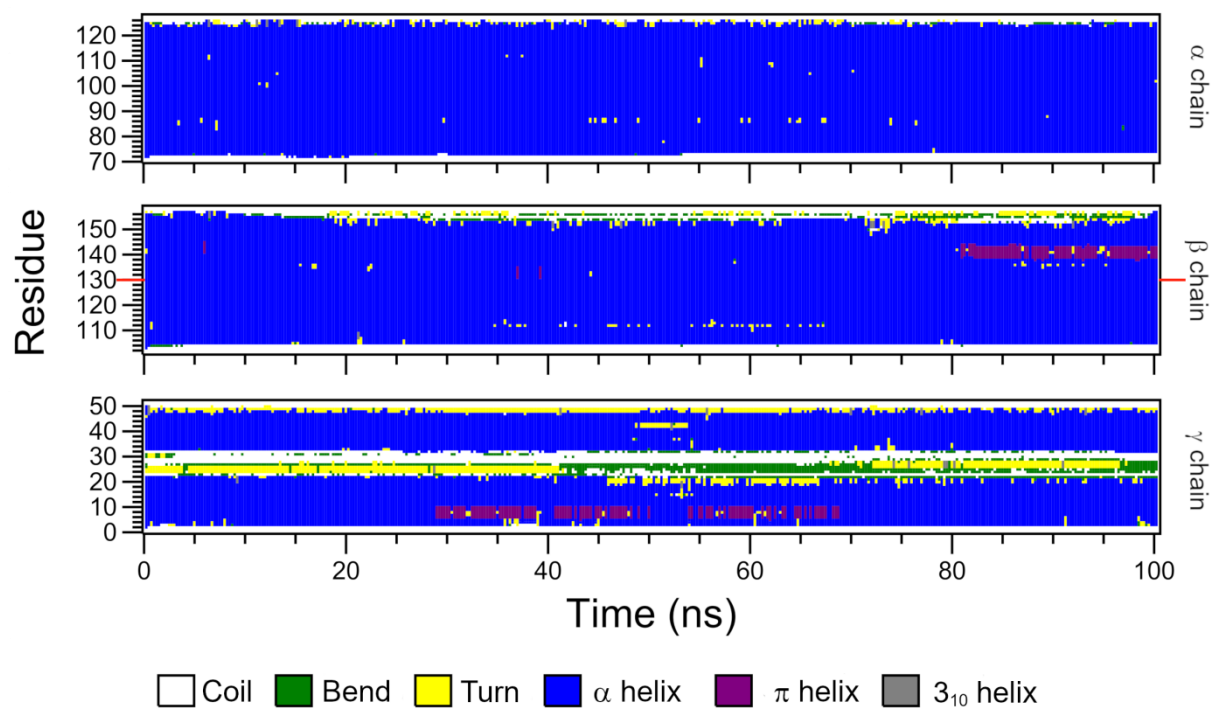

### B $\beta$ (Ac)K133

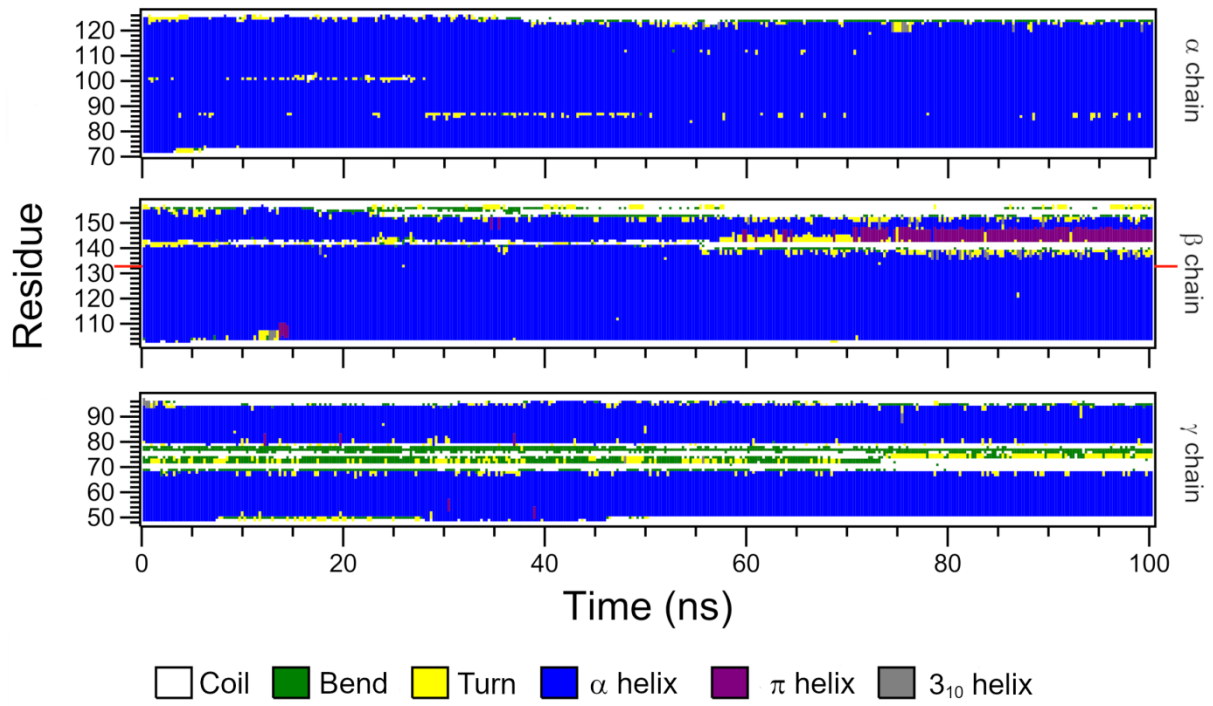

### B $\beta$ (Ox)K133

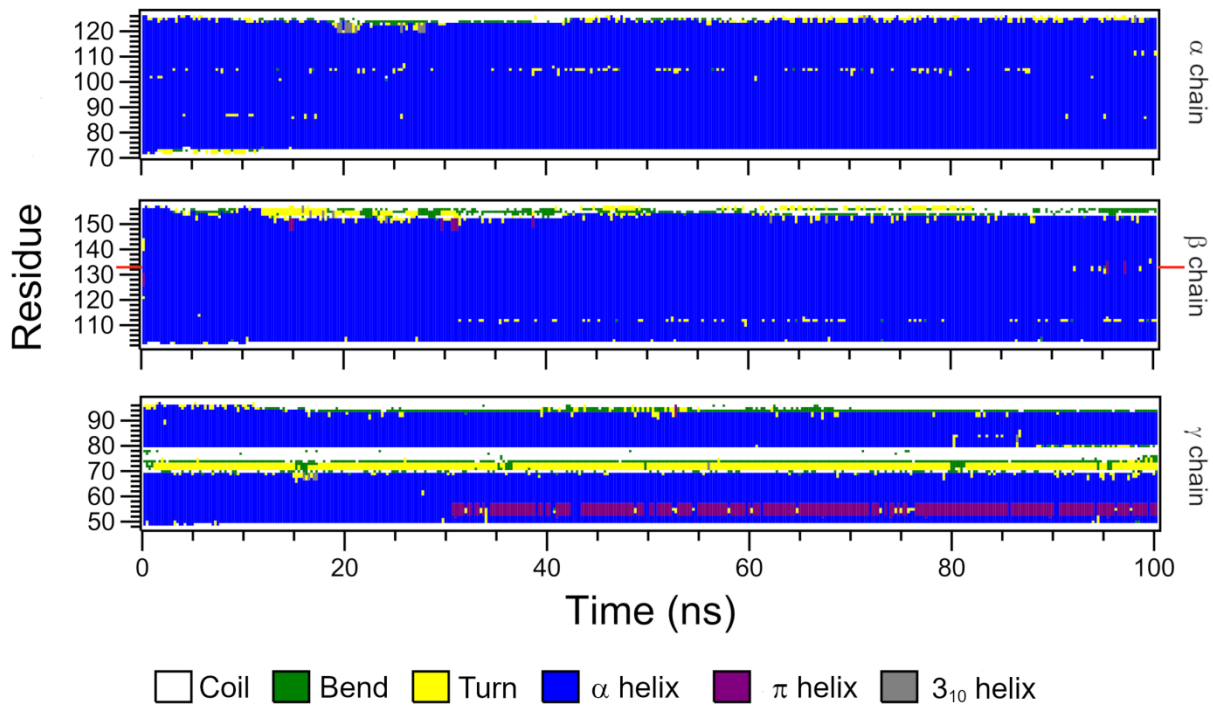

### $\gamma(\text{Ox})\text{K58}$

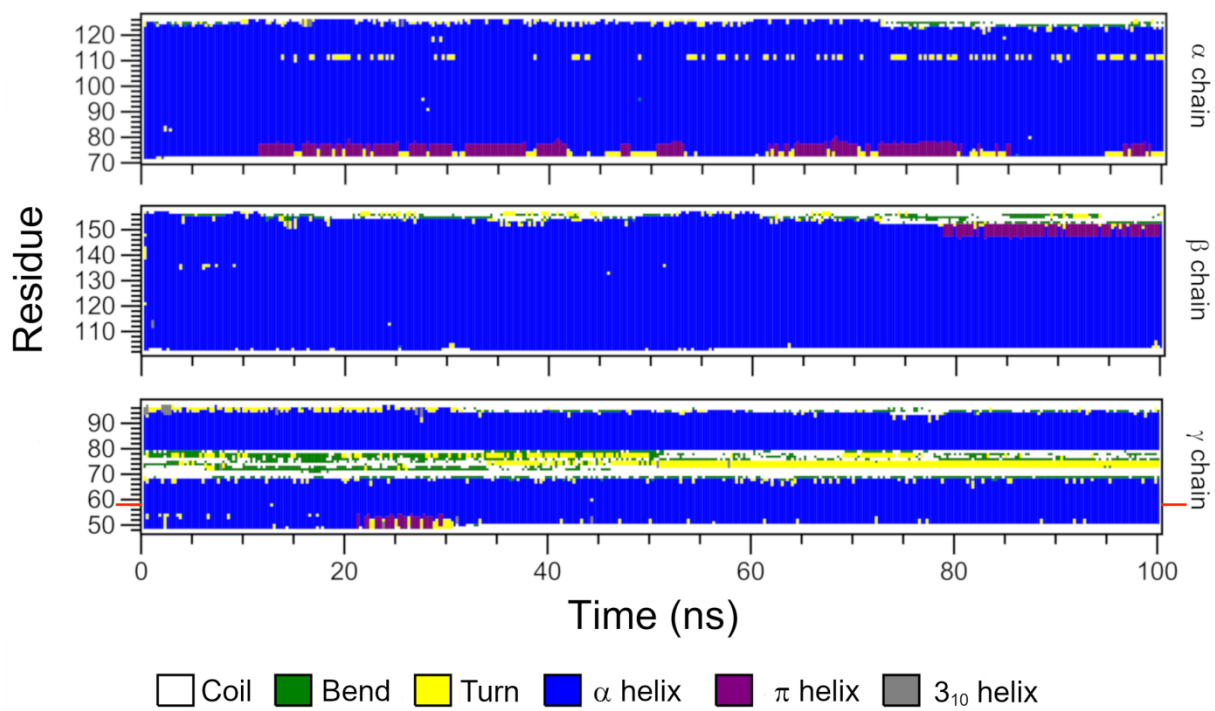

### $\gamma(\text{Ox})\text{P76E}$

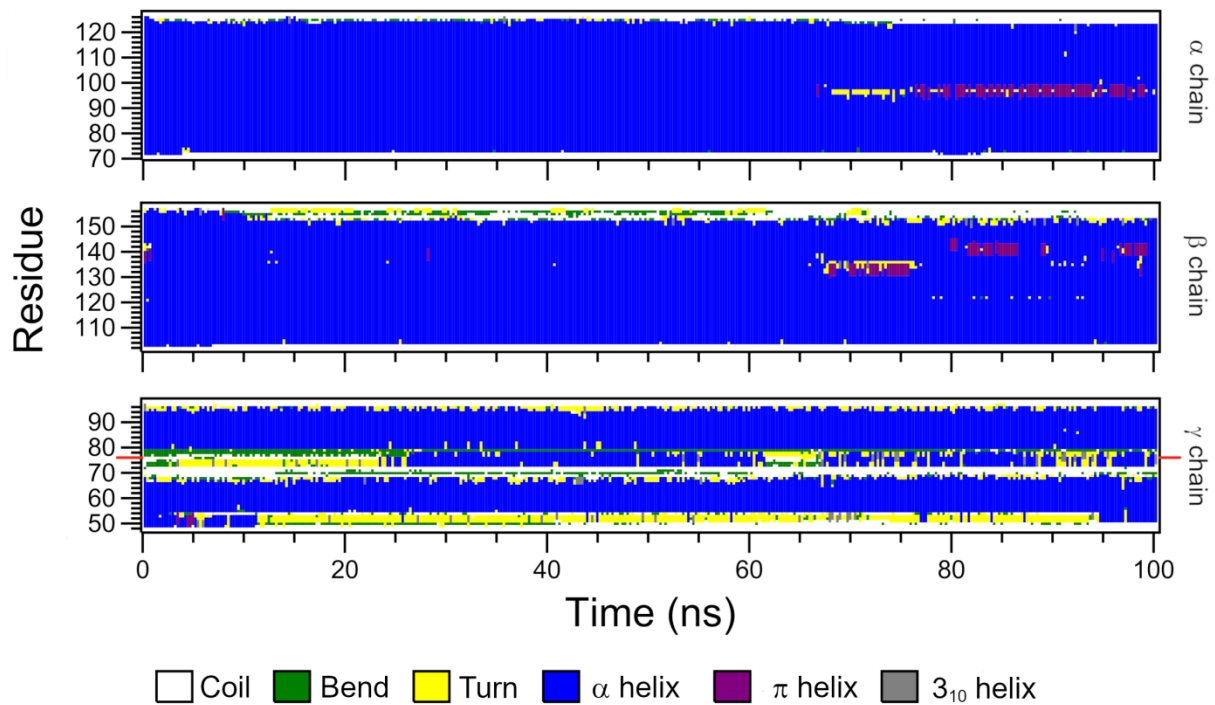

### A $\alpha$ (Ox)M91

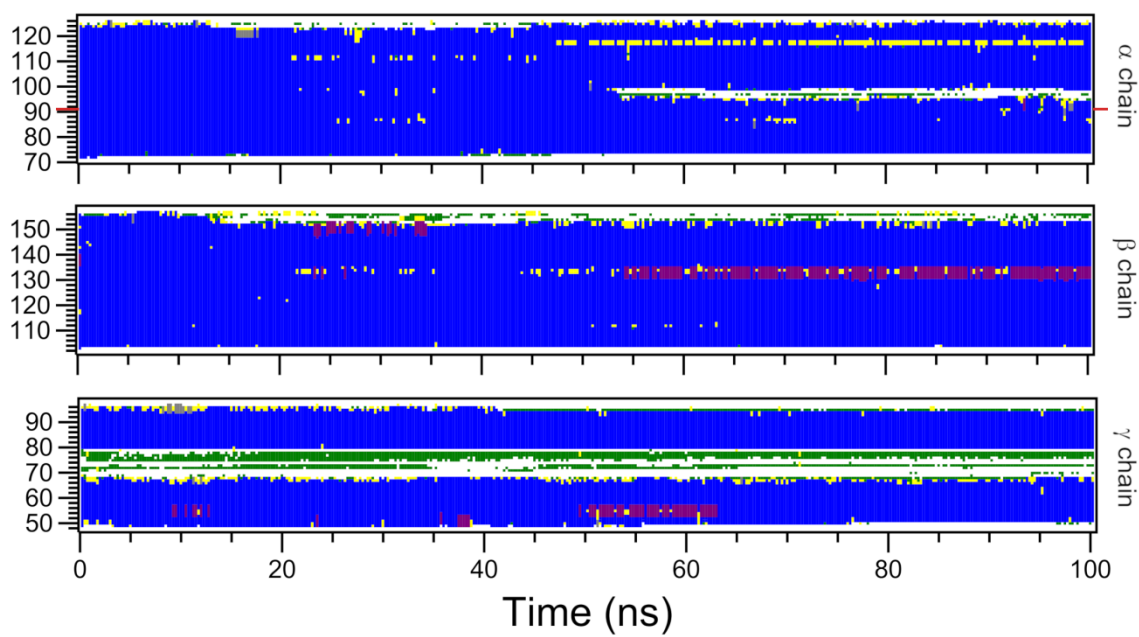

□ Coil    ■ Bend    ■ Turn    ■  $\alpha$  helix    ■  $\pi$  helix    ■  $3_{10}$  helix

### B $\beta$ (Ox)N140

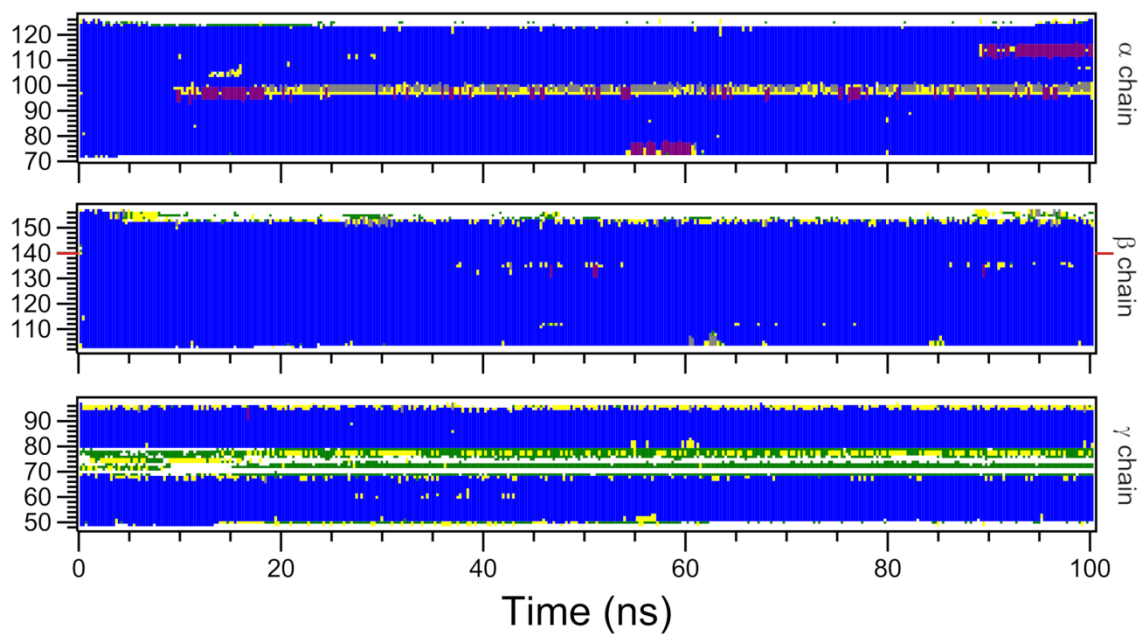

□ Coil    ■ Bend    ■ Turn    ■  $\alpha$  helix    ■  $\pi$  helix    ■  $3_{10}$  helix

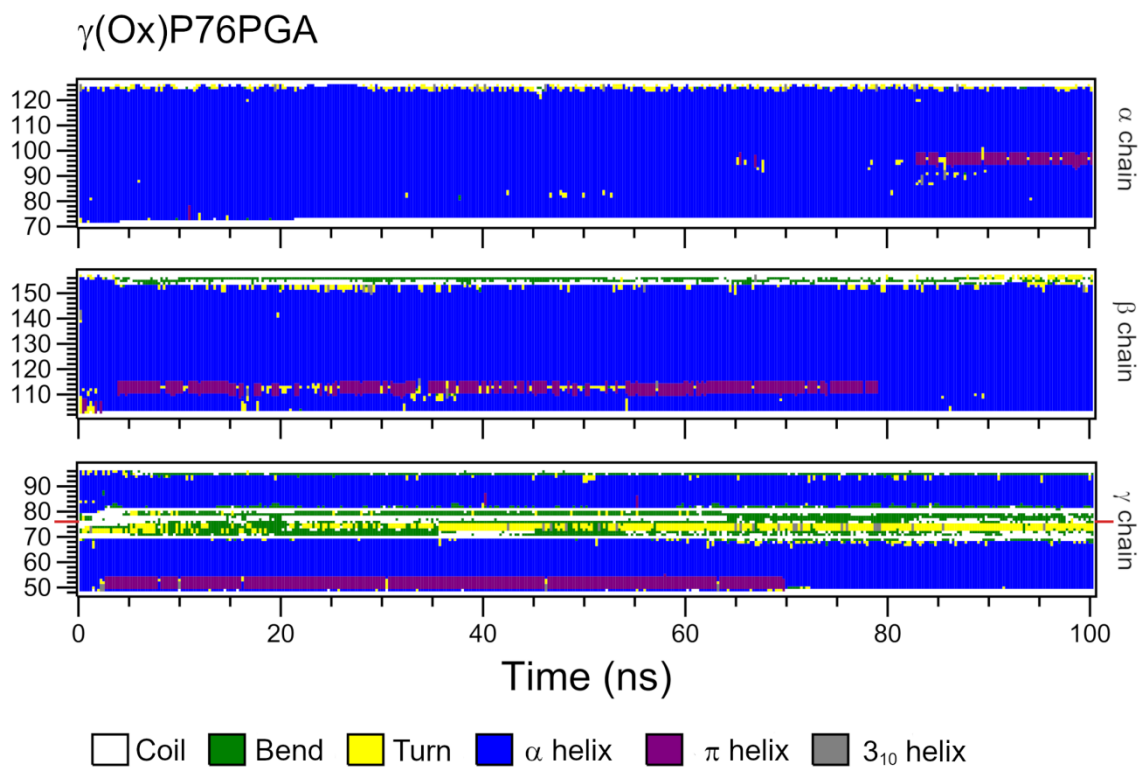

**Fig S6.** (all above) Development of secondary structure (DSSP) in time for coiled-coil connector systems. Positions of modified amino acids are highlighted by red bars at sides of plot.
