# Supplementary material for: Impact of posttranslational modifications on atomistic structure of fibrinogen
Source: PubMed Central journal article supplement (PMC6988951; doi:10.1371/journal.pone.0227543), 2020-01-29
Supplement: pone.0227543.s009.pdf [file pone.0227543.s009.pdf]

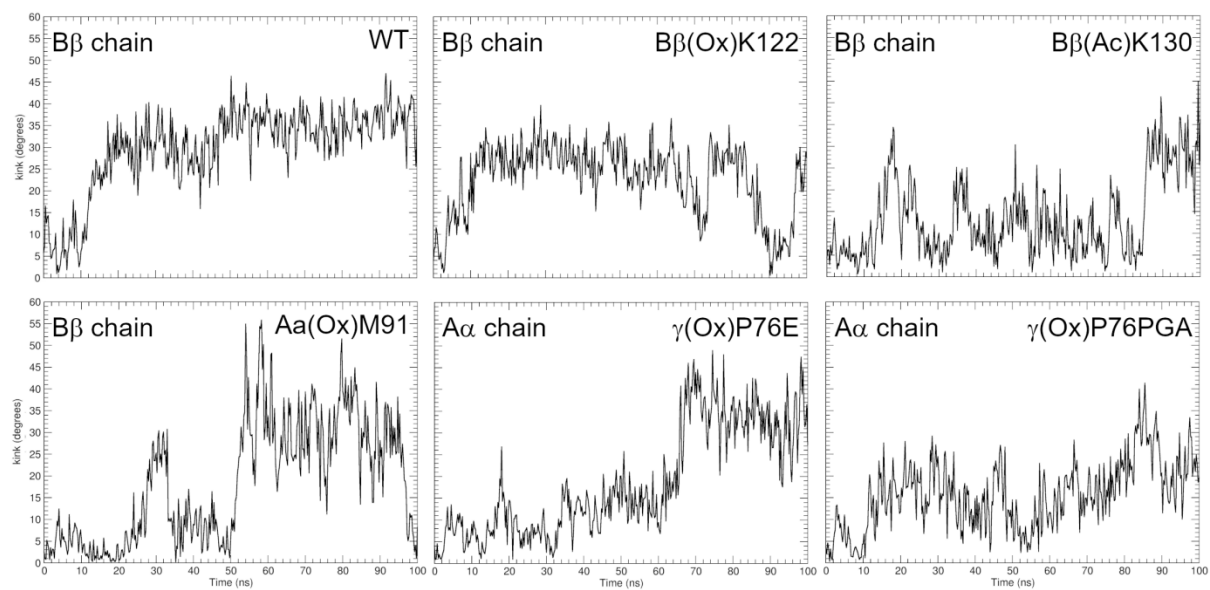

**Fig S7.** Characterization of kink induced into the  $\alpha$ -helices by their partial switch to  $\pi$ -helices. The decrease of the angle in B $\beta$ (Ox)K122 and A $\alpha$ (Ox)M91 may be caused by refolding of the  $\alpha$ -helix.
