# Supplementary material for: Impact of posttranslational modifications on atomistic structure of fibrinogen
Source: PubMed Central journal article supplement (PMC6988951; doi:10.1371/journal.pone.0227543), 2020-01-29
Supplement: pone.0227543.s011.pdf [file pone.0227543.s011.pdf]

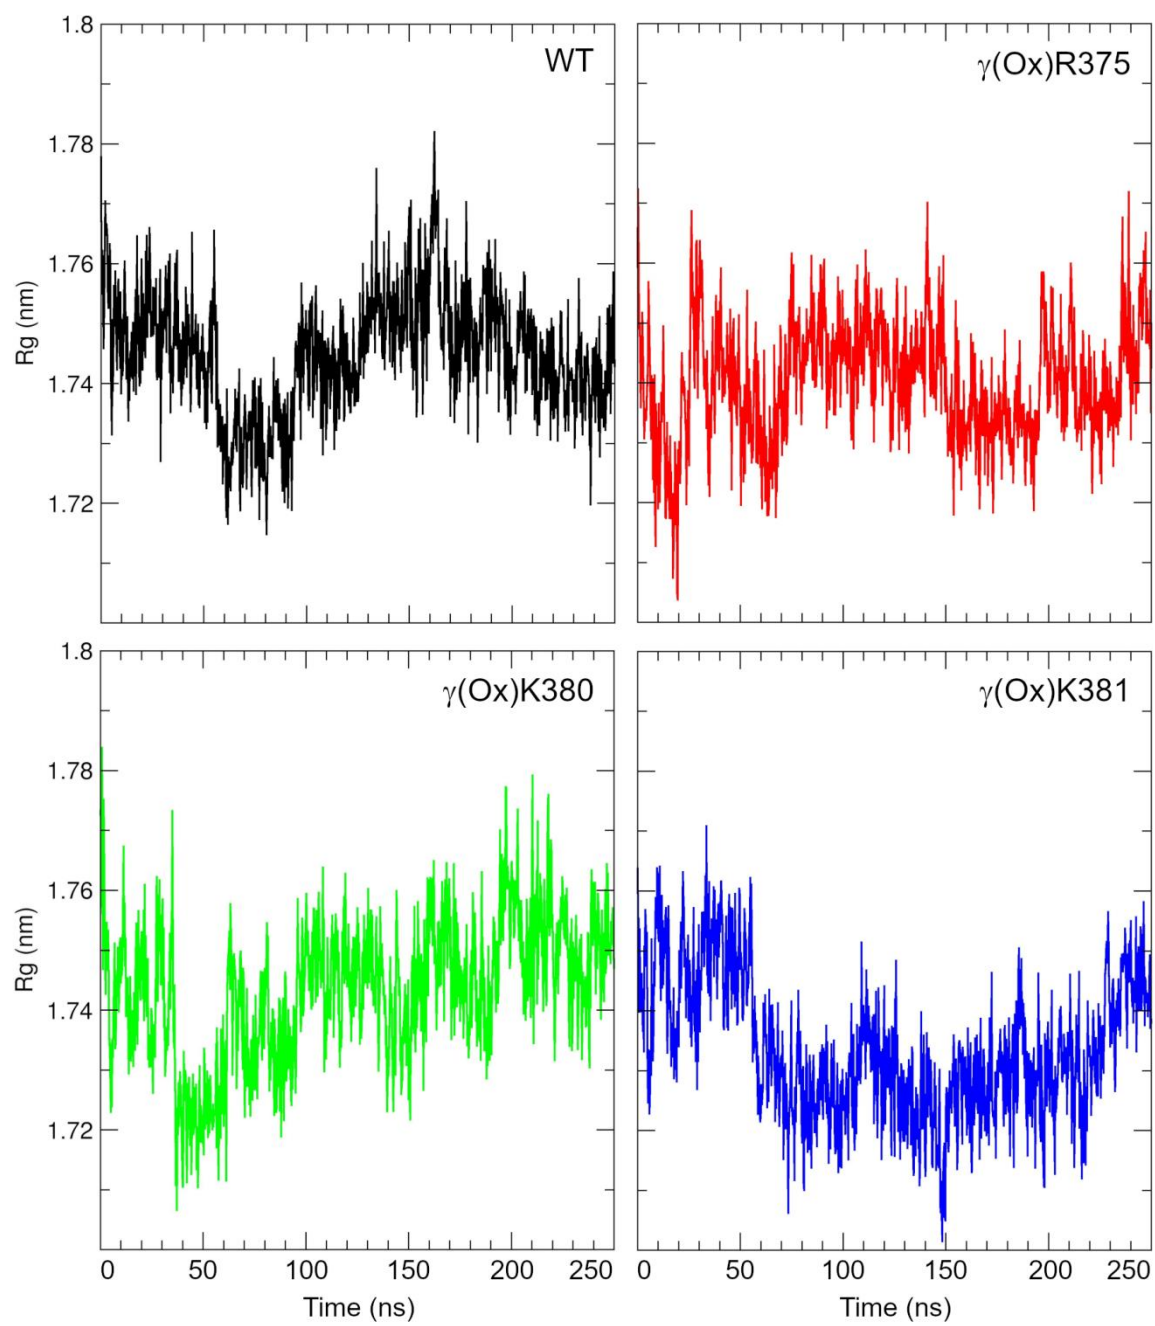

**Fig S9.** Development of radius of gyration of  $C_\alpha$  carbons in time for  $\gamma$ -nodule systems.
