# Supplementary material for: Impact of posttranslational modifications on atomistic structure of fibrinogen
Source: PubMed Central journal article supplement (PMC6988951; doi:10.1371/journal.pone.0227543), 2020-01-29
Supplement: pone.0227543.s012.pdf [file pone.0227543.s012.pdf]

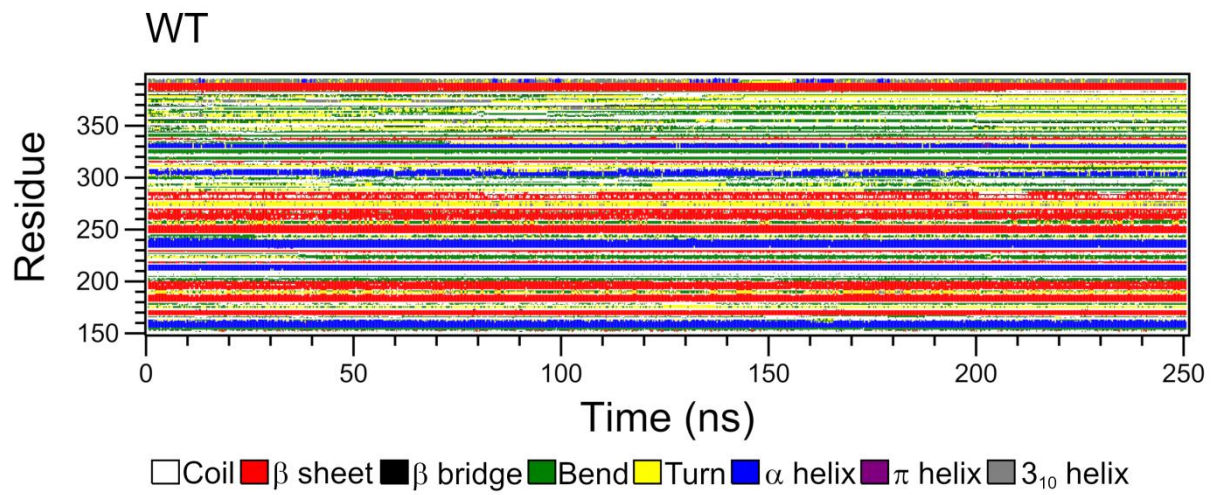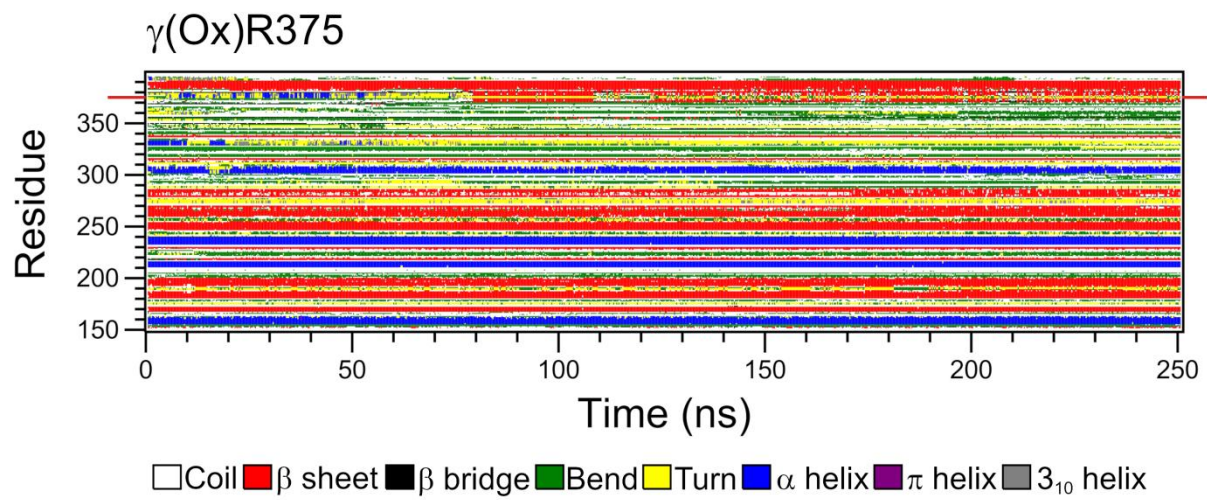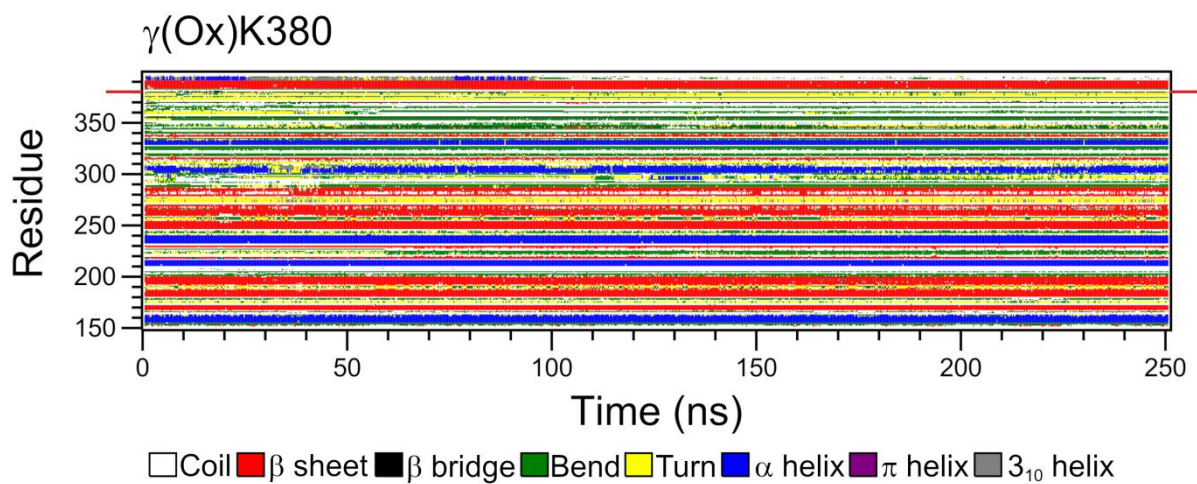

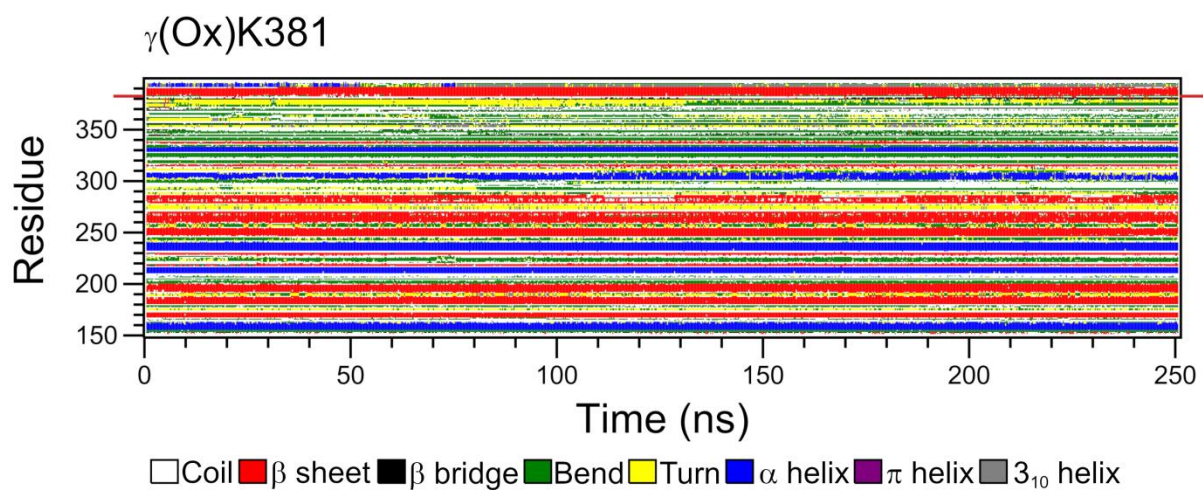

**Fig S10.** (all above) Development of secondary structure (DSSP) for systems examining  $\gamma$ -nodule of fibrinogen. Modified amino acid is highlighted by red bars at sides of plot.
