# Supplementary material for: Impact of posttranslational modifications on atomistic structure of fibrinogen
Source: PubMed Central journal article supplement (PMC6988951; doi:10.1371/journal.pone.0227543), 2020-01-29
Supplement: pone.0227543.s013.pdf [file pone.0227543.s013.pdf]

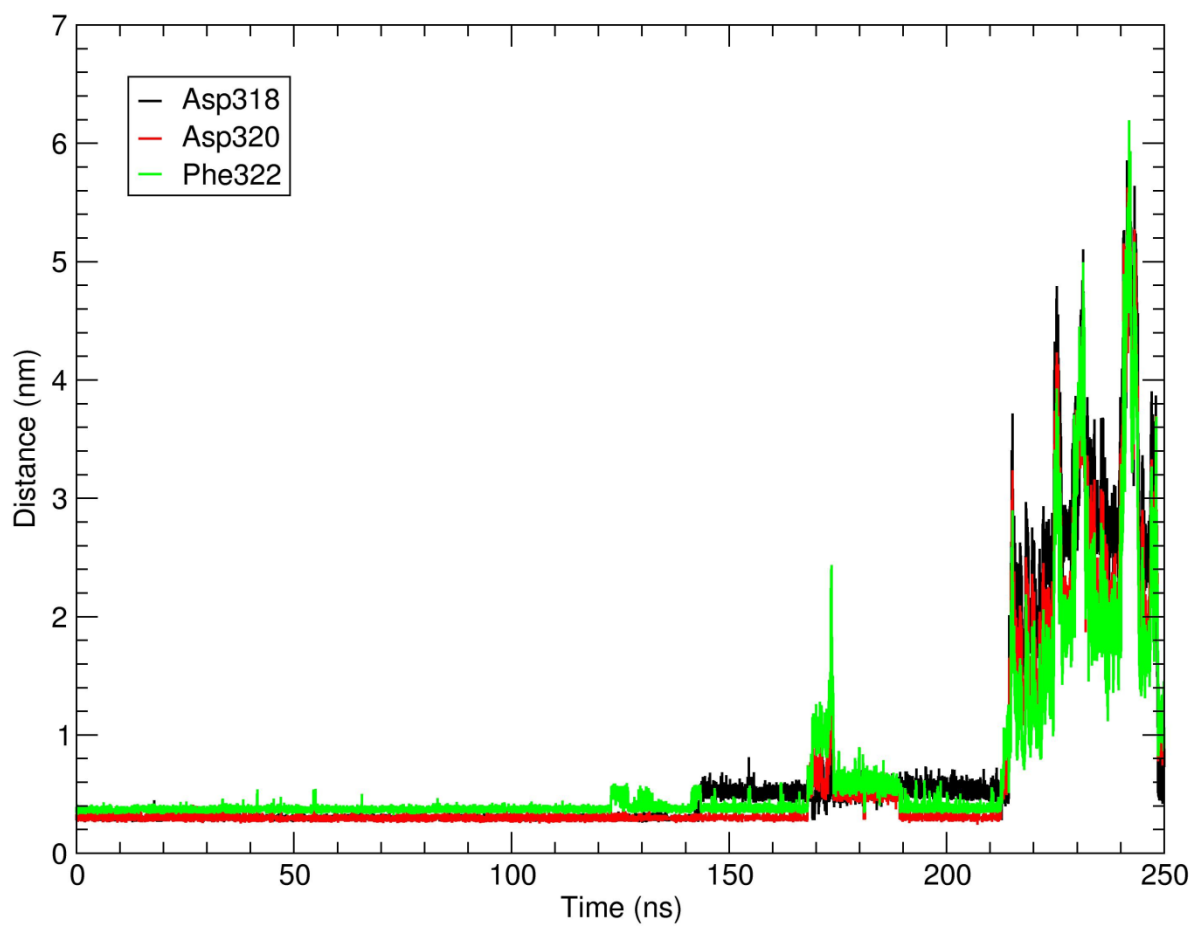

**Fig S11.** Unbinding of the  $\text{Ca}^{2+}$  ion. Distance of  $\text{Ca}^{2+}$  ion from  $\text{C}_\alpha$  carbons of  $\gamma\text{D318}$  (black), resp.  $\gamma\text{D320}$  (red) and from C carbon of  $\gamma\text{F322}$  (green) in dependence of time.
