# Supplementary material for: Impact of posttranslational modifications on atomistic structure of fibrinogen
Source: PubMed Central journal article supplement (PMC6988951; doi:10.1371/journal.pone.0227543), 2020-01-29
Supplement: pone.0227543.s014.pdf [file pone.0227543.s014.pdf]

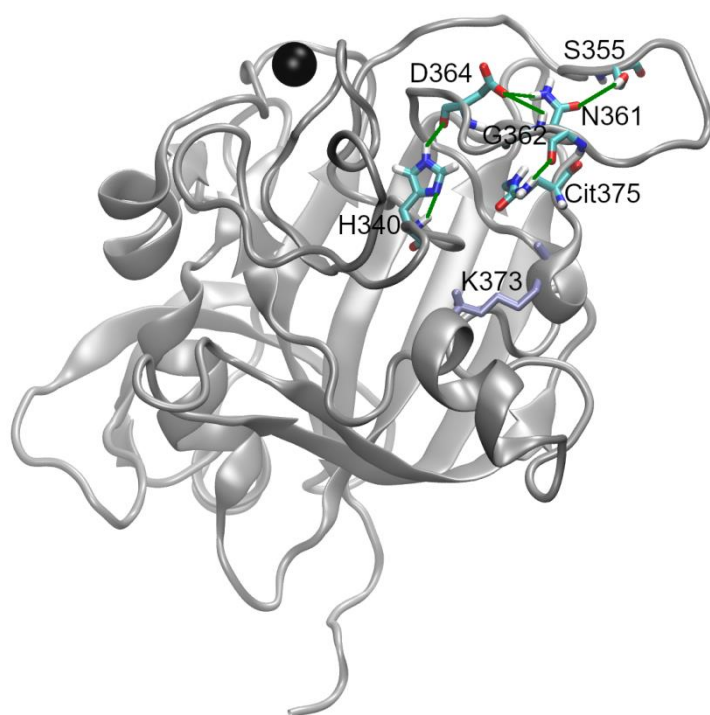

**Fig S12.** Hydrogen bond network formed as a result of oxidation of  $\gamma$ R375. Green lines show hydrogen bonds formed in the C-terminal part of the system with oxidized  $\gamma$ R375. In the WT simulation  $\gamma$ R375 forms hydrogen bond only with  $\gamma$ K373 (shown in violet). Carbon is shown in cyan, hydrogen in white, oxygen in red, nitrogen in blue and  $\text{Ca}^{2+}$  ion in black.
