# Supplementary material for: Impact of posttranslational modifications on atomistic structure of fibrinogen
Source: PubMed Central journal article supplement (PMC6988951; doi:10.1371/journal.pone.0227543), 2020-01-29
Supplement: pone.0227543.s015.pdf [file pone.0227543.s015.pdf]

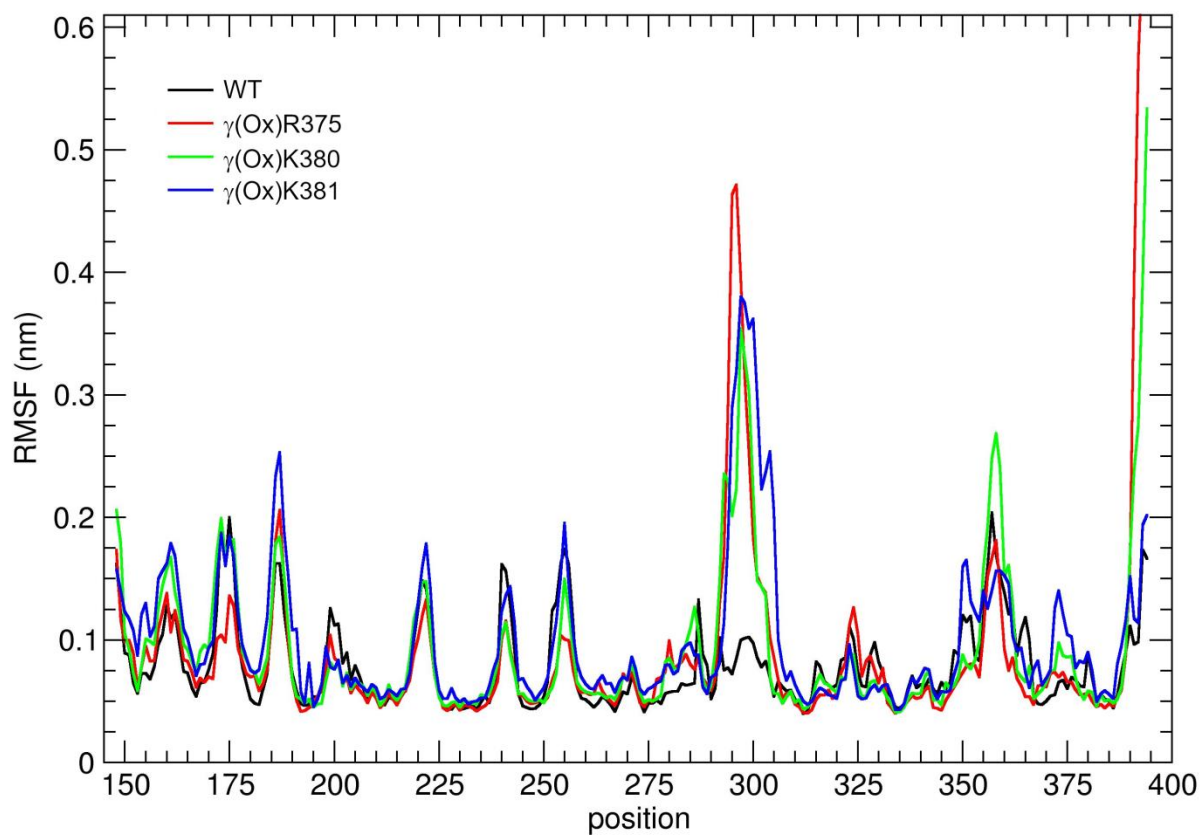

**Fig S13.** RMSF of  $C_{\alpha}$  carbons computed over the last 25 ns of simulations of the  $\gamma$ -nodule systems.
