# Supplementary material for: Impact of posttranslational modifications on atomistic structure of fibrinogen
Source: PubMed Central journal article supplement (PMC6988951; doi:10.1371/journal.pone.0227543), 2020-01-29
Supplement: pone.0227543.s016.pdf [file pone.0227543.s016.pdf]

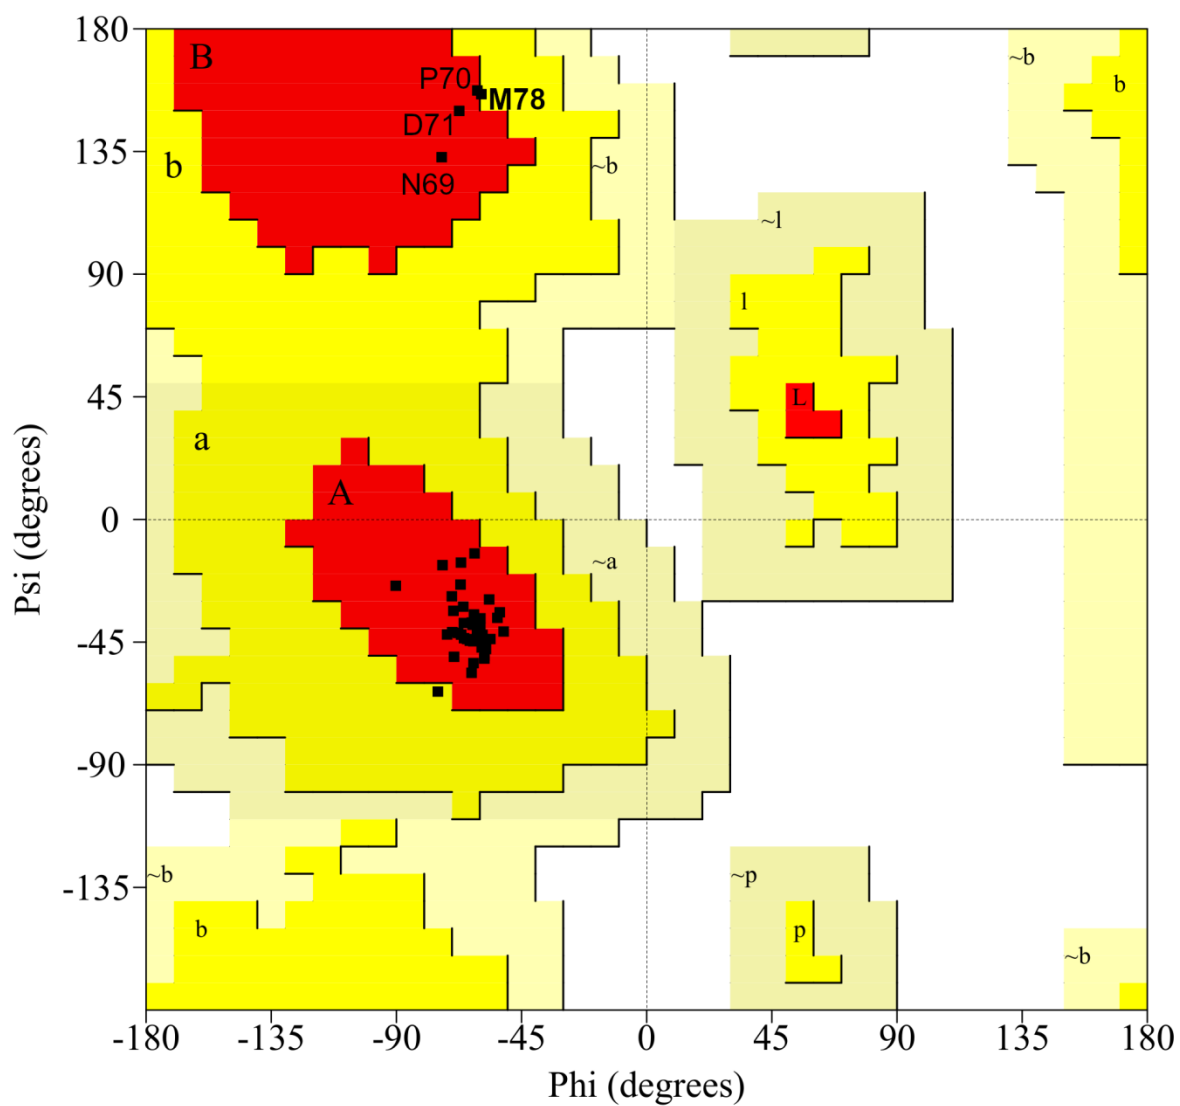

**Fig S14.** Ramachandran plot for selected amino acids of the  $\gamma$  chain. Ramachandran plot for amino acids  $\gamma 50$  to  $\gamma 90$  of fibrinogen shows  $\gamma M78$  in the region typical for collagen triple helix. The others amino acids nearby belongs to the unfolded region of the  $\gamma$  chain. Plot was made by Procheck [14].
